# Supplementary material
Source: Springer Nature journal article supplement (https://www.springermedizin.de/resource/supplementary/12891_2013_1945_MOESM6_ESM.pdf/9508860)
Supplement: MOESM6 [file 9508860]

|                                                                   |                                                                                      | diff † | p    | CON best | CAOS best |
|-------------------------------------------------------------------|--------------------------------------------------------------------------------------|--------|------|----------|-----------|
| Pain                                                              | How often do you experience knee pain?                                               | 0.45   | 0.05 |          |           |
|                                                                   | Twisting/pivoting on your knee                                                       | 0.29   | 0.09 |          |           |
|                                                                   | Straightening knee fully                                                             | 0.01   | 0.9  |          |           |
|                                                                   | Bending knee fully                                                                   | 0.26   | 0.2  |          |           |
|                                                                   | Walking on flat surface                                                              | 0.18   | 0.2  |          |           |
|                                                                   | Going up or down stairs                                                              | 0.23   | 0.3  |          |           |
|                                                                   | At night while in bed                                                                | 0.12   | 0.4  |          |           |
|                                                                   | Sitting or lying                                                                     | 0.15   | 0.3  |          |           |
|                                                                   | Standing upright                                                                     | 0.07   | 0.7  |          |           |
| Symptoms                                                          | Do you have swelling in your knee?                                                   | 0.21   | 0.3  |          |           |
|                                                                   | Do you feel grinding, hear clicking or any other type of noise when your knee moves? | 0.08   | 0.7  |          |           |
|                                                                   | Does your knee catch or hang up when moving?                                         | -0.05  | 0.6  |          |           |
|                                                                   | Can you straighten your knee fully?                                                  | -0.05  | 0.8  |          |           |
|                                                                   | Can you bend your knee fully?                                                        | 0.41   | 0.09 |          |           |
|                                                                   | How severe is your knee joint stiffness after first wakening in the morning?         | 0.22   | 0.2  |          |           |
|                                                                   | How severe is your knee stiffness after sitting, lying or resting later in the day?  | 0.10   | 0.6  |          |           |
| ADL                                                               | Descending stairs                                                                    | 0.37   | 0.09 |          |           |
|                                                                   | Ascending stairs                                                                     | 0.21   | 0.3  |          |           |
|                                                                   | Rising from sitting                                                                  | 0.27   | 0.1  |          |           |
|                                                                   | Standing                                                                             | 0.12   | 0.4  |          |           |
|                                                                   | Bending to floor/pick up an object                                                   | 0.34   | 0.05 |          |           |
|                                                                   | Walking on flat surface                                                              | 0.14   | 0.3  |          |           |
|                                                                   | Getting in/out of car                                                                | 0.41   | 0.03 |          |           |
|                                                                   | Going shopping                                                                       | 0.15   | 0.3  |          |           |
|                                                                   | Putting on socks/stockings                                                           | 0.15   | 0.3  |          |           |
|                                                                   | Rising from bed                                                                      | 0.18   | 0.2  |          |           |
|                                                                   | Taking off socks/stockings                                                           | 0.07   | 0.6  |          |           |
|                                                                   | Lying in bed (turning over, maintaining knee position)                               | 0.25   | 0.1  |          |           |
|                                                                   | Getting in/out of bath                                                               | 0.09   | 0.6  |          |           |
|                                                                   | Sitting                                                                              | 0.18   | 0.2  |          |           |
|                                                                   | Getting on/off toilet                                                                | 0.29   | 0.06 |          |           |
| Heavy domestic duties (moving heavy boxes, scrubbing floors, etc) | 0.21                                                                                 | 0.3    |      |          |           |
| Light domestic duties (cooking, dusting, etc)                     | 0.15                                                                                 | 0.3    |      |          |           |
| Sport&Rec                                                         | Squatting                                                                            | 0.23   | 0.3  |          |           |
|                                                                   | Running                                                                              | 0.20   | 0.4  |          |           |
|                                                                   | Jumping                                                                              | 0.37   | 0.2  |          |           |
|                                                                   | Twisting/pivoting on your injured knee                                               | 0.18   | 0.4  |          |           |
|                                                                   | Kneeling                                                                             | 0.39   | 0.1  |          |           |
| QOL                                                               | How often are you aware of your knee problem?                                        | 0.32   | 0.2  |          |           |
|                                                                   | Have you modified your life style to avoid potentially damaging activities?          | 0.23   | 0.2  |          |           |
|                                                                   | How much are you troubled with lack of confidence in your knee?                      | -0.15  | 0.4  |          |           |
|                                                                   | In general, how much difficulty do you have with your knee?                          | 0.37   | 0.04 |          |           |
